# Supplementary material for: MAT2A facilitates PDCD6 methylation and promotes cell growth under glucose deprivation in cervical cancer
Source: PubMed Central journal article supplement (PMC8993843; doi:10.1038/s41420-022-00987-6), 2022-04-08
Supplement: 41420_2022_987_MOESM1_ESM.pdf [file 41420_2022_987_MOESM1_ESM.pdf]

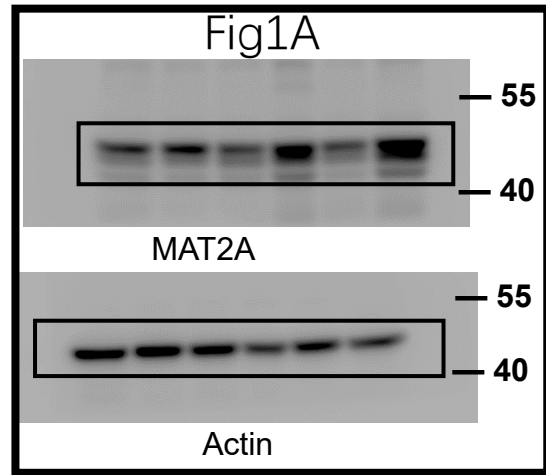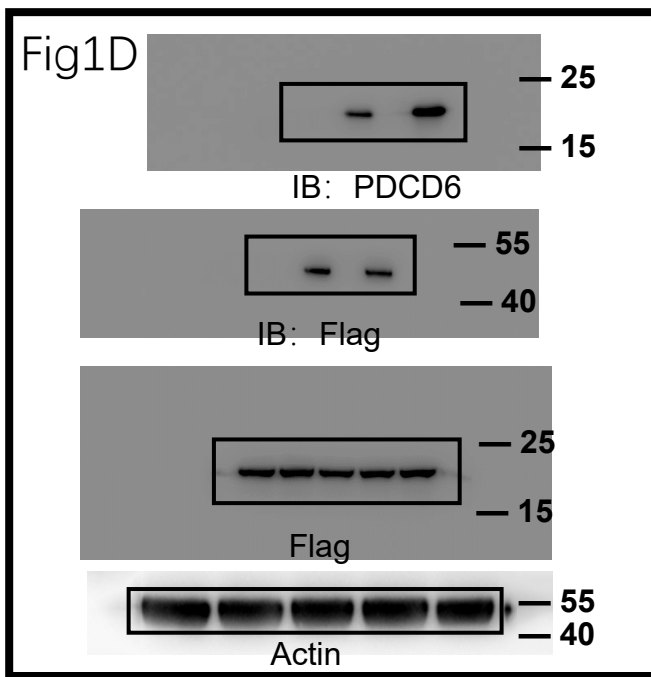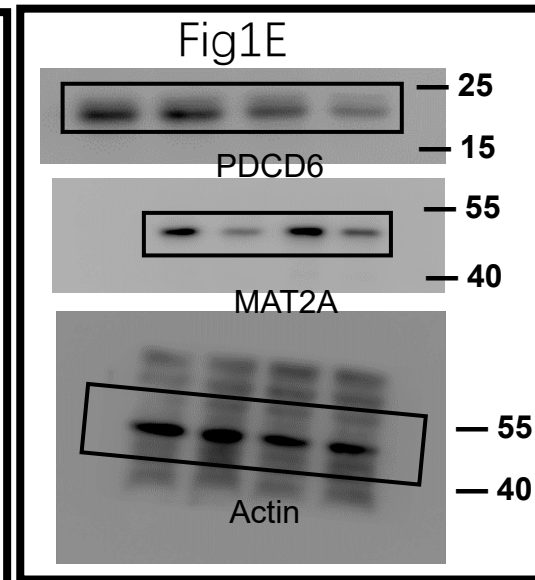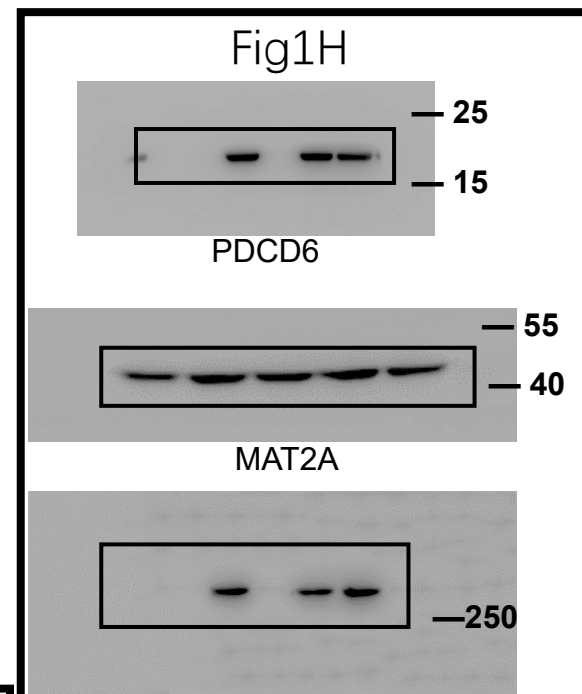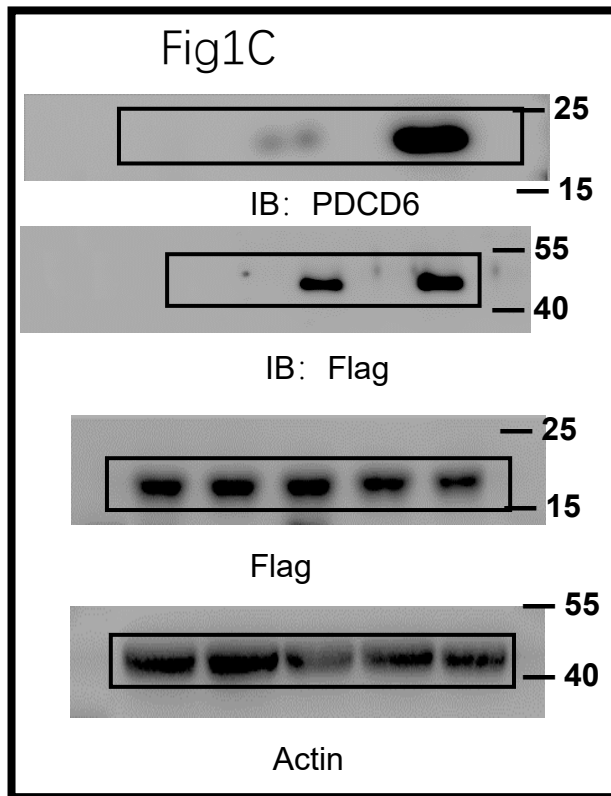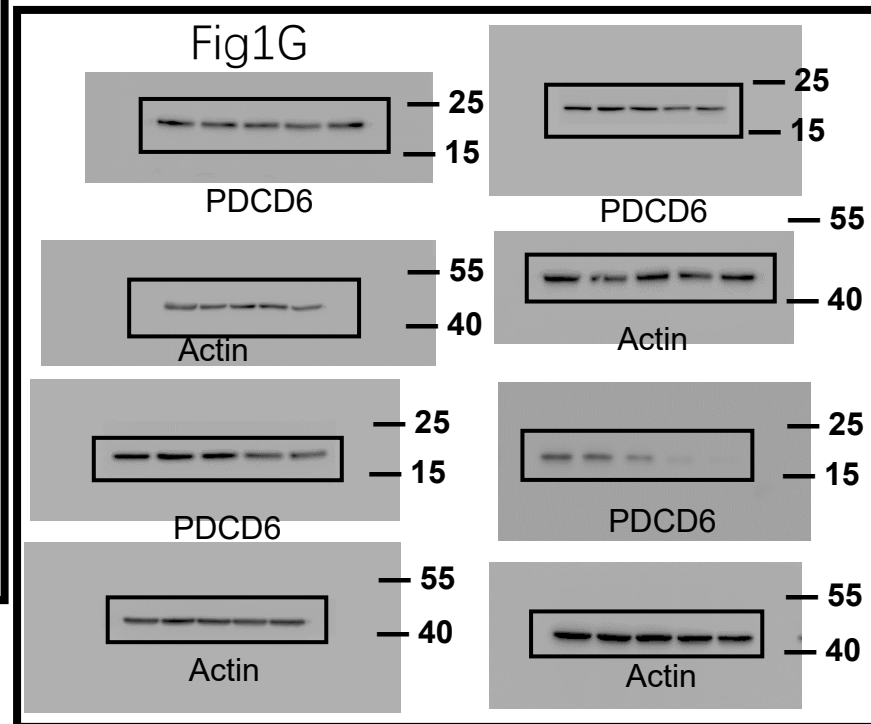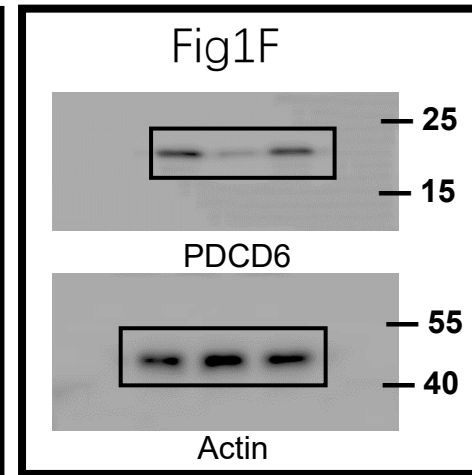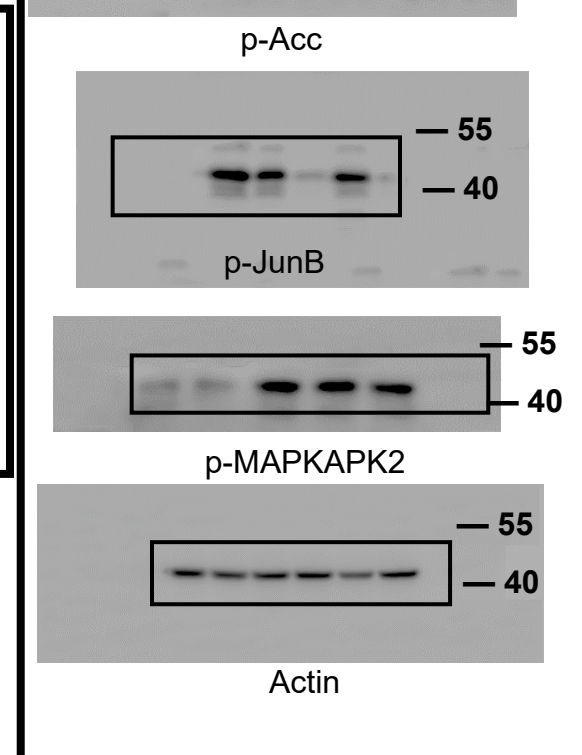

Fig2G

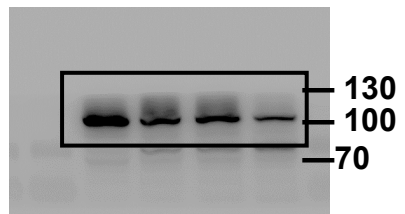

PARP

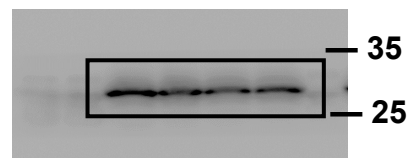

Caspase3

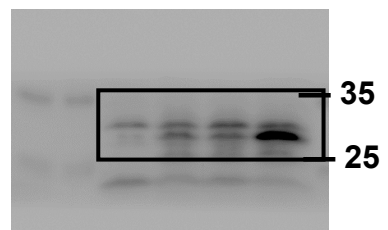

Cleaved-caspase3

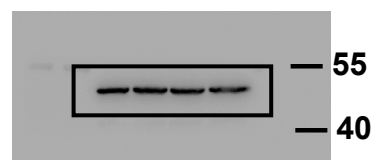

Actin

Fig2H

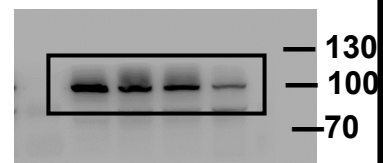

PARP

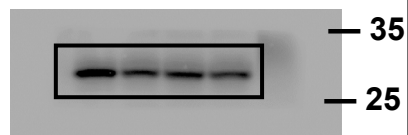

Caspase3

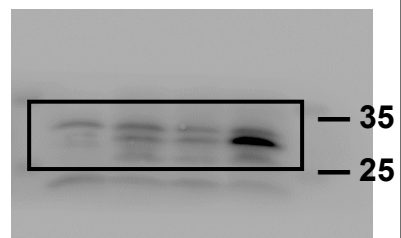

Cleaved-caspase3

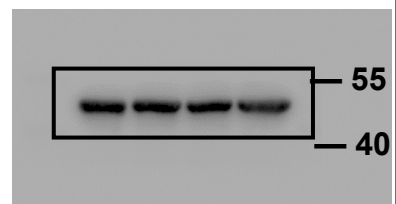

Actin

Fig2I

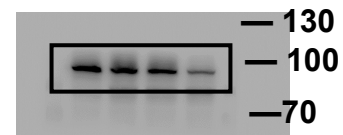

PARP

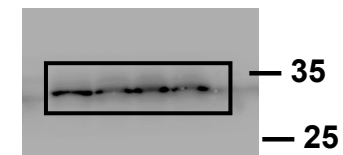

Caspase3

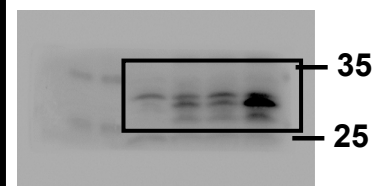

Cleaved-caspase3

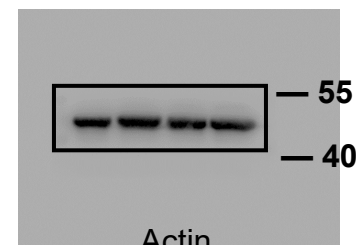

Actin

Fig3B

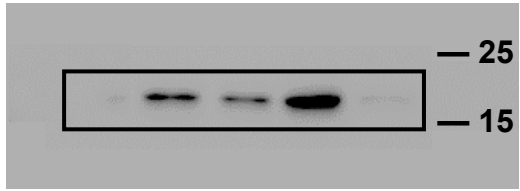

IB: M-PDCD6

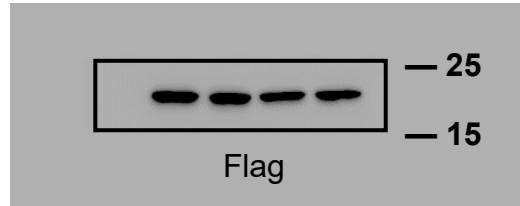

Flag

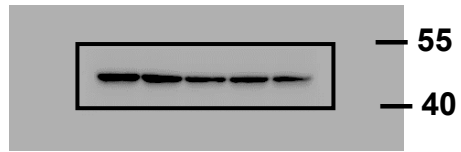

Actin

Fig3C

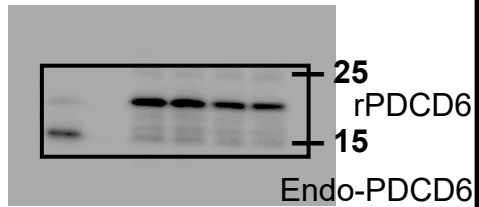

rPDCD6

Endo-PDCD6

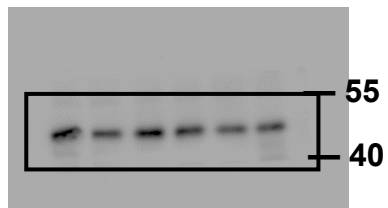

Actin

Fig3D

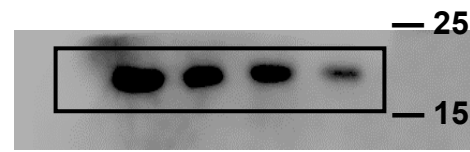

IB: M-lysine

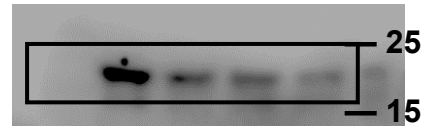

IB: M-Arginine

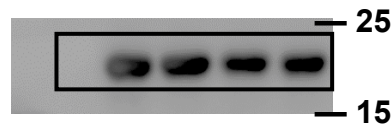

Flag

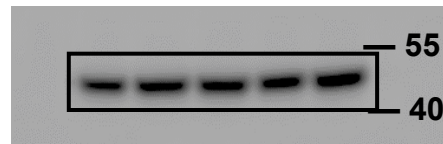

Actin

Fig4C

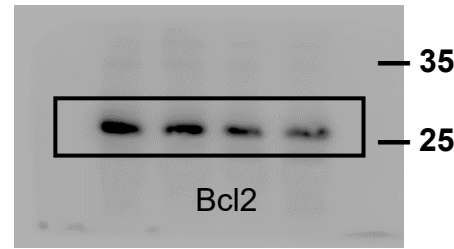

Bcl2

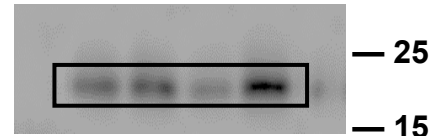

Bax

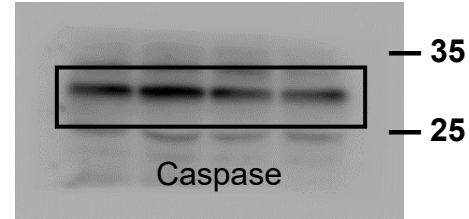

Caspase

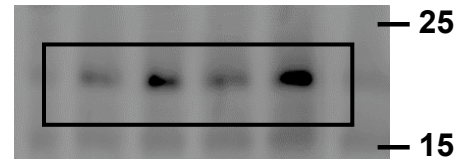

Cleaved-Caspase

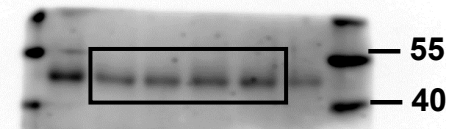

Actin

Fig4D

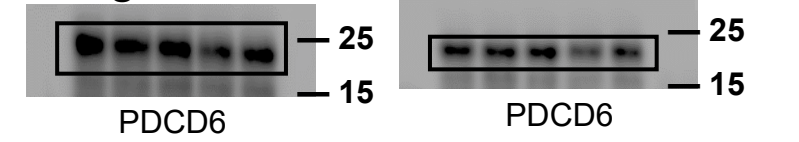

PDCD6

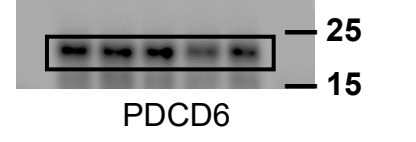

PDCD6

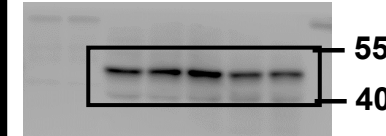

Actin

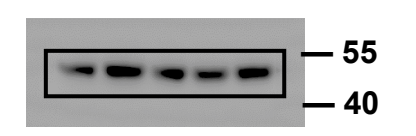

Actin

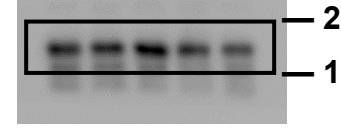

PDCD6

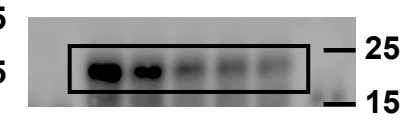

PDCD6

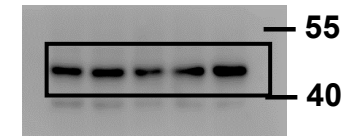

Actin

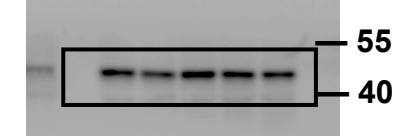

Actin
